# Supplementary material
Source: PubMed Central journal article supplement (PMC8418447)
Supplement: kiab156_supplementary_data.pdf [file kiab156_supplementary_data.pdf]

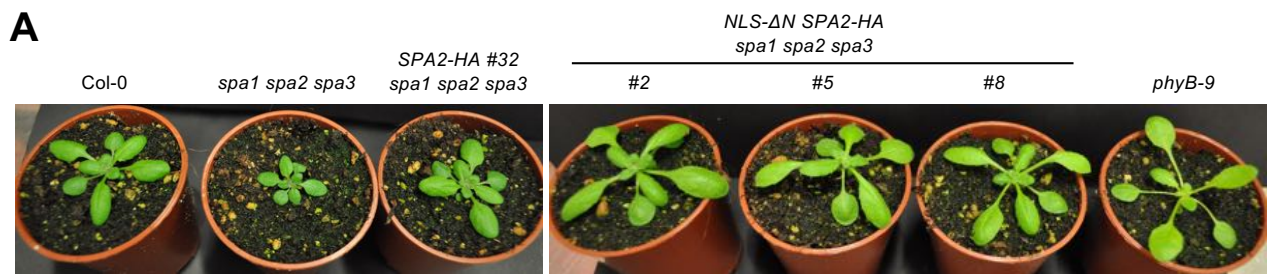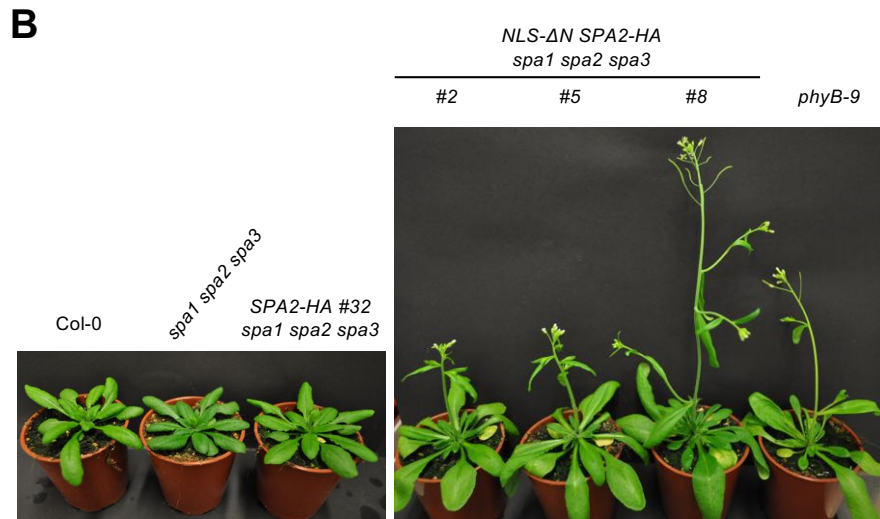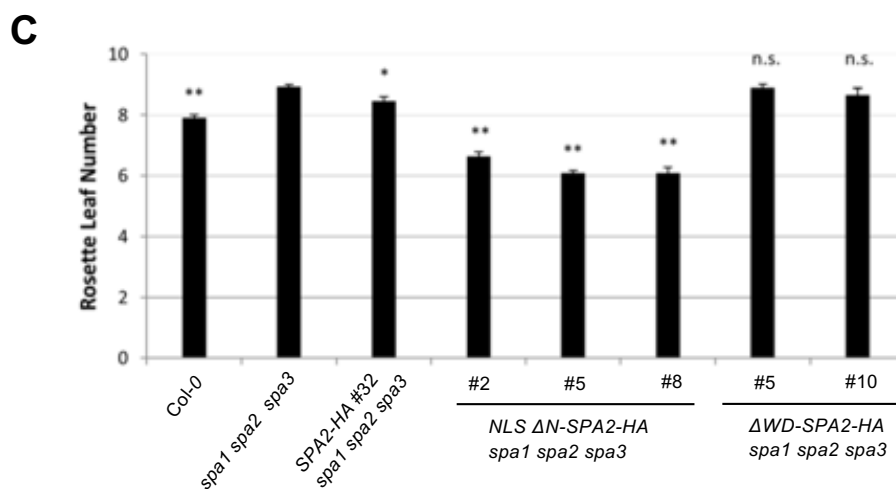

**Figure S1. Transgenic lines expressing NLS-ΔN SPA2 exhibit longer petioles and early flowering.**

**A, B.** Visual phenotype of the indicated genotypes grown in long day for three weeks (**A**) or four weeks (**B**).

**C.** Flowering time of the indicated genotypes, determined as number of rosette leaves produced at the time of bolting. Plants were grown in long day. Error bars represent SEM of 9-15 plants. All transgenes are in the *spa1 spa2 spa3* mutant background. Line numbers represent independent transgenic lines. Asterisks indicate statistically significant differences when compared to *spa1 spa2 spa3* (\* $P < 0.05$ , \*\* $P < 0.01$ , n.s. not significant at  $P < 0.05$ ).

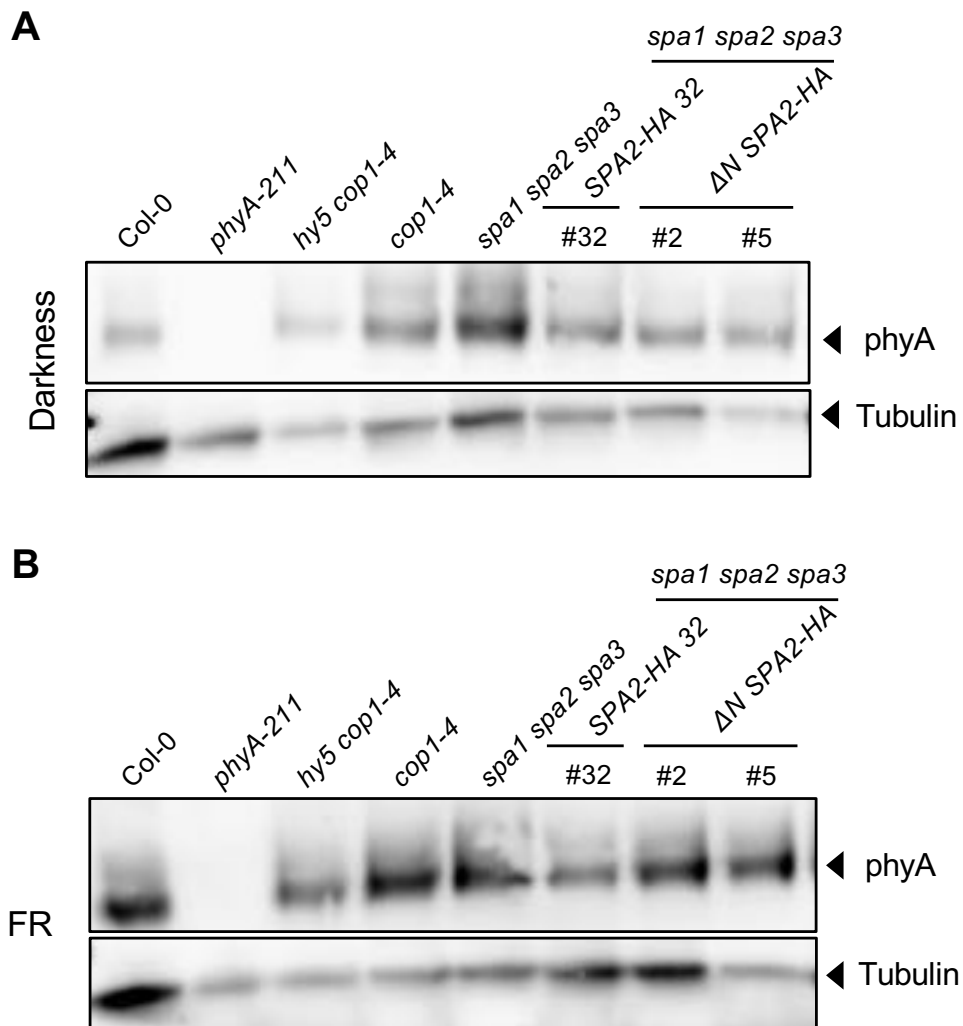

**Figure S2. Immunodetection of phyA protein levels.**

**A, B.** Seedlings were grown in darkness for 4 days (**A**) or shifted to FRc ( $1 \mu\text{mol m}^{-2} \text{s}^{-1}$ ) for 6 h (**B**). Proteins were detected using  $\alpha$ -phyA antibody. Tubulin levels, detected by  $\alpha$ -tubulin, are shown as a loading control.

## Supplemental Materials and Methods

### Plasmid constructions

The SPA2 N-terminal deletion fragment (NLS  $\Delta$ N SPA2-HA) was amplified from full-length SPA2 ORF using the primer pair SPA2 deltaN Apa1 NLS F and SPA2 deltaN Not1 R, introducing a ApaI restriction site and an artificial NLS at 5', and a 3' NotI restriction site lacking stop codon. The resulting fragments were introduced into the pJET1.2 vector using the manufacturer's instructions (Thermo Fisher Scientific, Schwerte, Germany). After sequencing to confirm the correct sequences, the deletion constructs were digested with ApaI and NotI and ligated into the ApaI and NotI sites of the pBS SK+ vector carrying the SPA2 5' and 3' regulatory sequences as described previously (Balcerowicz et al., 2011), resulting in the pBS NLS  $\Delta$ N SPA2 construct. With the HA-specific primers 3xHA-NotI-F and 3xHA-NotITGA-R, a triplicate of HA was amplified with a stop codon at the end of its sequence using pJHA212-hpt SPA2::SPA1-HA (Balcerowicz et al., 2011) as a template. The HA PCR products were ligated into the pBS NLS  $\Delta$ N SPA2 construct via NotI sites. The resulting constructs were digested with KpnI and ligated into the pJHA212-hpt binary vector (Yoo et al., 2005), as described in Balcerowicz et al. (2011), to generate the pJHA212-hpt NLS  $\Delta$ N SPA2-HA which was used for transformation of the *spa1-7 spa2-1 spa3-1* mutant.

To generate the SPA2 $\Delta$ WD-HA binary vector, the coding sequence of SPA2 $\Delta$ WD was PCR-amplified from full-length SPA2 ORF using the primer pair SPA2-Apa1-F and SPA2 delta WD NotI R. The resulting fragment was subsequently cloned as described above to generate pJHA212-hpt SPA2 $\Delta$ WD-HA which was transformed into the *spa1-7 spa2-1 spa3-1* mutant.

To generate SPA2 deletion constructs for yeast two-hybrid assays, respective sequences corresponding to the deletion constructs described above were amplified by PCR using Gateway attachment sites and cloned into pDONR221 and subsequently into pAS 2.1 (Clontech) that had been modified to insert a Gateway cassette into the multiple cloning site. SPA2-NT expressed amino acids 1-579, retaining the complete kinase-like domain but excluding the coiled-coil domain.

To generate SPA3-HA- and SPA4-HA-expressing transgenic plants, the respective open-reading-frame of SPA3 and SPA4 was amplified using the primer pairs SPA3/SPA4-ApaI-F and SPA3/SPA4-NotI-R and fused to a triple-HA tag and SPA2 5' and 3' regulatory sequences as described above followed by subcloning into the pJHA212-hpt binary vector as described above.

## References

- Balcerowicz M, Fittinghoff K, Wirthmueller L, Maier A, Fackendahl P, Fiene G, Koncz C, Hoecker U** (2011) Light exposure of Arabidopsis seedlings causes rapid destabilization as well as selective post-translational inactivation of the repressor of photomorphogenesis SPA2. *Plant J* **65**: 712-723
- Yoo SY, Bomblies K, Yoo SK, Yang JW, Choi MS, Lee JS, Weigel D, Ahn JH** (2005) The 35S promoter used in a selectable marker gene of a plant transformation vector affects the expression of the transgene. *Planta* **221**: 523-530

**Supplemental Table 1: Oligonucleotides**

| Primer name                        | Sequence 5' to 3'                                                              |
|------------------------------------|--------------------------------------------------------------------------------|
| 3xHA-NotI-F                        | CCTAGCGGCCGCTTACCCATATGACGTTCCAGAC                                             |
| 3xHA-NotITGA-R                     | GGTAGCGGCCGCTCAAGCGTAGTCAGGTACGTCGTAAG                                         |
| SPA2 deltaN Apal NLS F             | CCGAGGGCCCATGATGGATCTTCCTAAGAAGAAGAGAAAGGTTGGA<br>GGATCTTTATCCATTGAACA AGAGGAC |
| SPA2 delta N NotI R                | TTAAGCGGCCGCGACCAACTGTAGAACTTTTGATTG                                           |
| SPA2-Apa1-F                        | CCGAGGGCCCATGCCTGTTATGGAAAGAGTAGCTGAA                                          |
| SPA2 delta WD NotI R               | TTAAGCGGCCGCGGTTTTCAAACCTTACTATATCGAGC                                         |
| TS_SPA2_attB1_for                  | GGGGACAAGTTTTGTACAAAAAAGCAGGCTTCATGATGGATGAGGGA<br>TCAGTAGG                    |
| TS_SPA2_attB2_rev                  | GGGGACCACTTTGTACAAGAAAGCTGGGTGCGACCAACTGTAGAACT<br>TTGATTGAC                   |
| TS_SPA2_deltaWD_at<br>tB2_rev      | GGGGACCACTTTGTACAAGAAAGCTGGGTGAGTTTCAAACCTTACTAT<br>ATCG                       |
| TS_SPA2_GA_rev                     | AGTGCGGCCGCGAATTGACCAACTGTAGAACTTTGATTGACC                                     |
| TS_SPA2_WD_attB1_<br>NLS ATG for 1 | GAAAGGTTGGAGGAAAATATGCTCGATATAGTAAGTTTGAAACTCG                                 |
| SPA3-Apal-F                        | CCGAGGGCCCATGGAAGGTTCTTCAAATTC                                                 |
| SPA3-NotI-R                        | TTAAGCGGCCGCGAGTCATCATCTCCAGAA                                                 |
| SPA4-Apal-F                        | CCGAGGGCCCATGAAGGTTCTTCAAGATCT                                                 |
| SPA4-NotI-R                        | TTAAGCGGCCGCGATACCATCTCCAAAATCTTG                                              |
